# Supplementary material for: New insights into the relationship between photocatalytic activity and TiO2–GR composites
Source: Royal Society of Chemistry journal article supplement (doi:10.1039/c5ra02458g), 2015-01-01
Supplement: c5ra02458g1.pdf [file c5ra02458g1.pdf]

# New insights on the relationship between the photocatalytic activity and TiO<sub>2</sub>-GR Composites

Yanyan Zhu<sup>a, b, ‡</sup>, Yajun Wang<sup>c, ‡</sup>, Wenqing Yao<sup>a</sup>, Ruilong Zong<sup>a</sup>, and Yongfa Zhu<sup>a, \*</sup>

\*Corresponding author: Yongfa Zhu; Address: Department of Chemistry, Beijing Key Laboratory for Analytical Methods and Instrumentation, Tsinghua University, Beijing, 100084, P.R. China; Fax: (+86)10-6278-7601; Tel.: (+86) 10-6278-7601; Email: zhuyf@mail.tsinghua.edu.cn

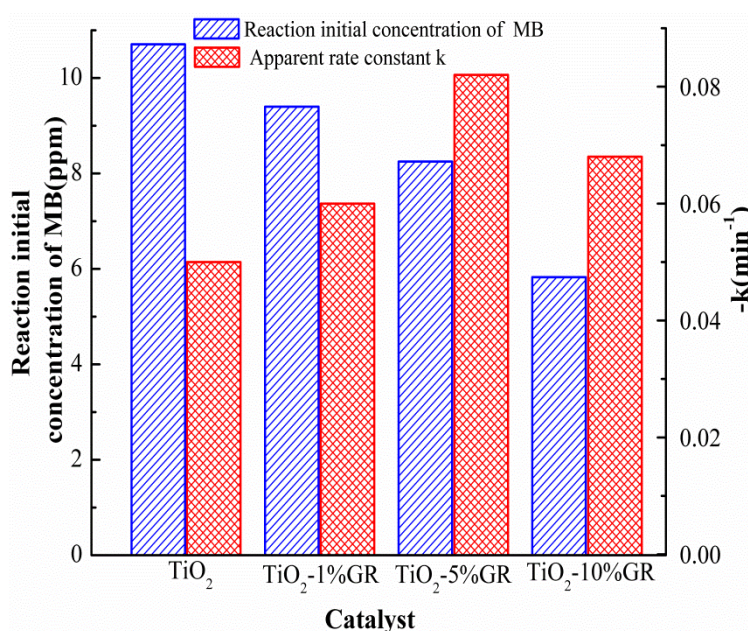

Fig.S1 The adsorption and photocatalytic oxidative degradation performance of MB over TiO<sub>2</sub> and TiO<sub>2</sub>-GR composites under 11.2 ppm MB initial concentration (The suspensions were stirred in the dark for 4 h to get adsorption-desorption equilibrium, the light intensity of 254 nm UV light is 0.9 mW·cm<sup>-2</sup>).

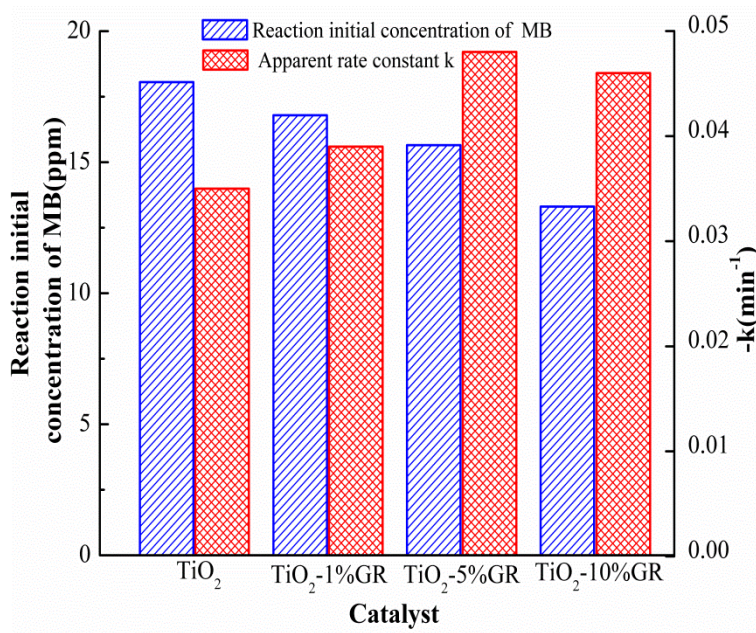

12

13 Fig.S2 The adsorption and photocatalytic oxidative degradation performance of MB over TiO<sub>2</sub> and  
 14 TiO<sub>2</sub>-GR composites under 18.7 ppm MB initial concentration (The suspensions were stirred in the  
 15 dark for 4 h to get adsorption-desorption equilibrium, the light intensity of 254 nm UV light is 0.9  
 16 mW·cm<sup>-2</sup>).

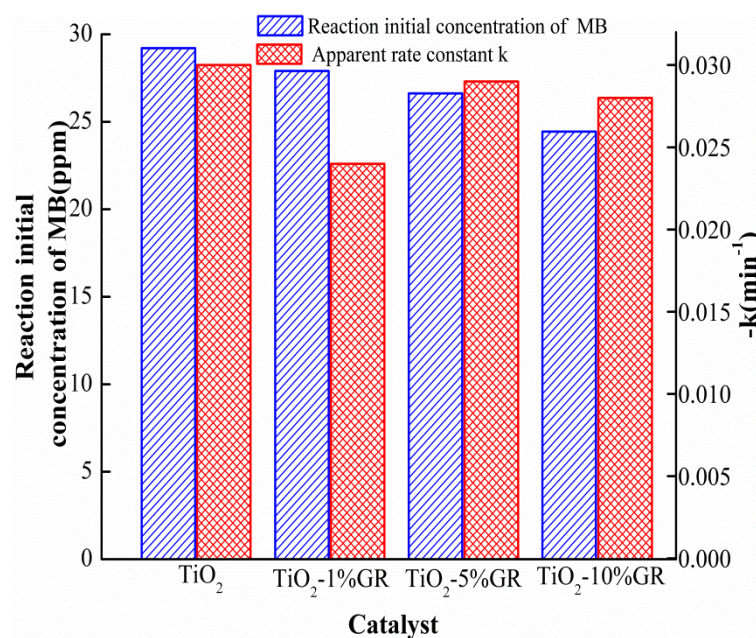

17

18 Fig.S3 The adsorption and photocatalytic oxidative degradation performance of MB over TiO<sub>2</sub> and  
 19 TiO<sub>2</sub>-GR composites under 29.9 ppm MB initial concentration (The suspensions were stirred in the  
 20 dark for 4 h to get absorption-desorption equilibrium, the light intensity of 254 nm UV light is 0.9  
 21 mW·cm<sup>-2</sup>).



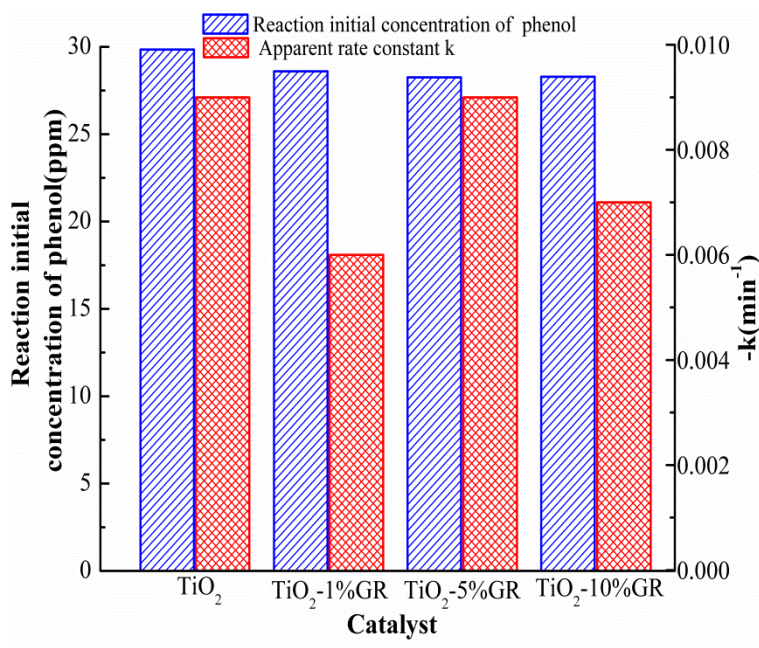

22

23 Fig.S4 The adsorption and photocatalytic oxidative degradation performance of phenol over  $\text{TiO}_2$  and  
 24  $\text{TiO}_2$ -GR composites under 30.0 ppm phenol initial concentration (The suspensions were stirred in the  
 25 dark for 4 h to get adsorption-desorption equilibrium, the light intensity of 254 nm UV light is 0.9  
 26  $\text{mW}\cdot\text{cm}^{-2}$ ).

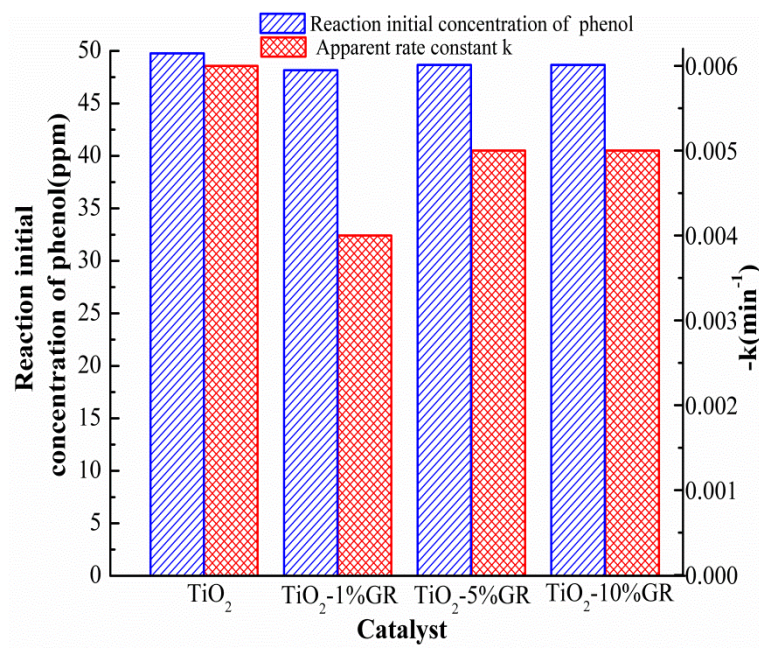

27

28 Fig.S5 The adsorption and photocatalytic oxidative degradation performance of phenol over  $\text{TiO}_2$  and  
 29  $\text{TiO}_2$ -GR composites under 50.0 ppm phenol initial concentration (The suspensions were stirred in the  
 30 dark for 4 h to get adsorption-desorption equilibrium, the light intensity of 254 nm UV light is 0.9  
 31  $\text{mW}\cdot\text{cm}^{-2}$ ).

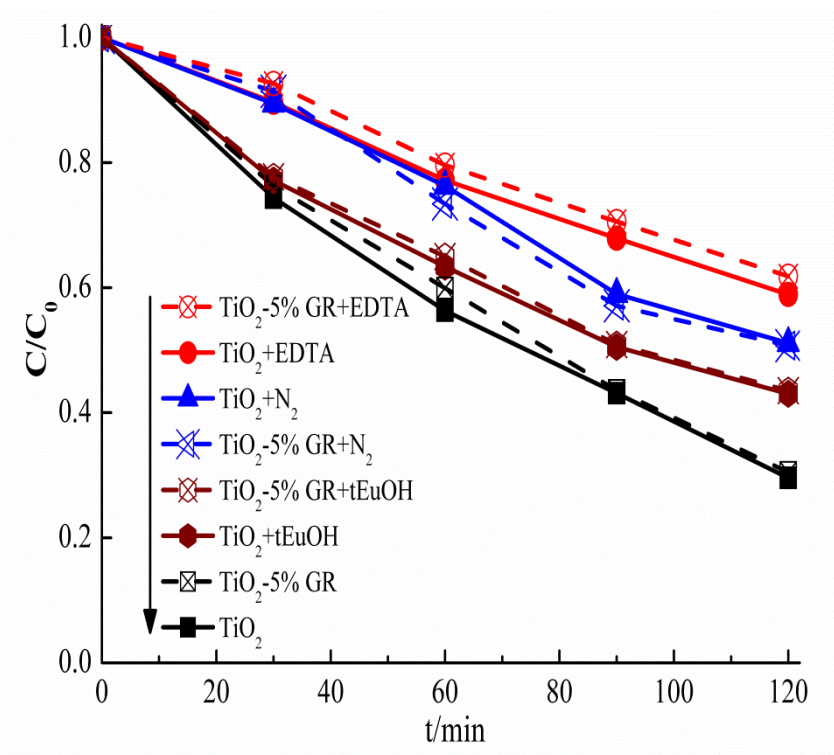

32

33 Fig.S6 The plots of oxidative species trapping in the system of photodegradation of phenol over TiO<sub>2</sub> and  
 34 TiO<sub>2</sub>-GR composites (phenol initial concentration =10 ppm,  $\lambda$ = 254 nm)

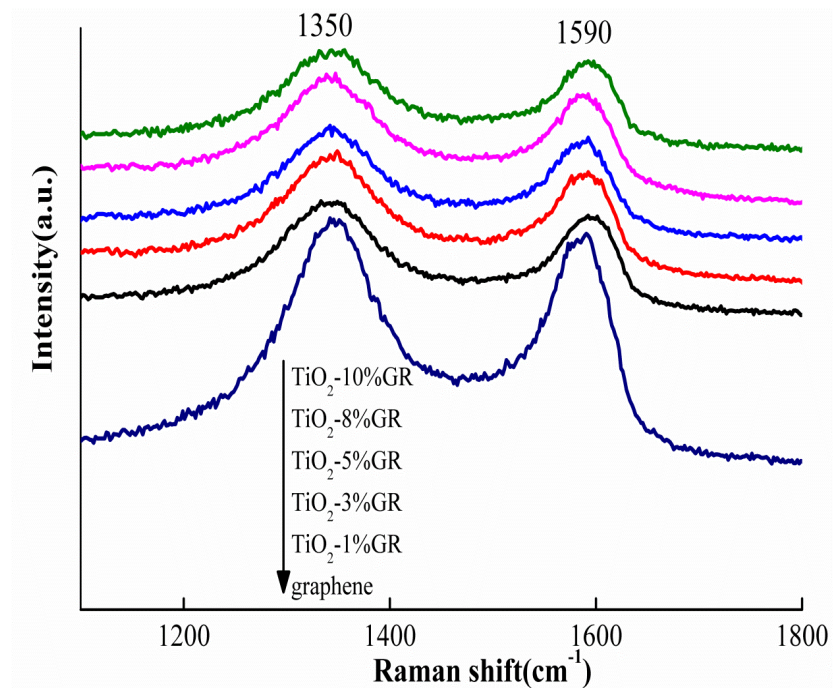

35

36

Fig.S7 Raman spectra of graphene and TiO<sub>2</sub>-GR composites
